# Supplementary material
Source: PubMed Central journal article supplement (PMC3984317)
Supplement: cc-13-941-s01.pdf [file cc-13-941-s01.pdf]

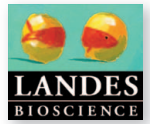

## **Supplemental Material to:**

**Nathan J Schuld, Andrew D Hauser, Adam J Gastonguay,  
Jessica M Wilson, Ellen L Lorimer, and Carol L Williams**

**SmgGDS-558 regulates the cell cycle in pancreatic, non-  
small cell lung, and breast cancers**

**Cell Cycle 2014; 13(6)**

**<http://dx.doi.org/10.4161/cc.27804>**

**<http://www.landesbioscience.com/journals/cc/article/27804>**

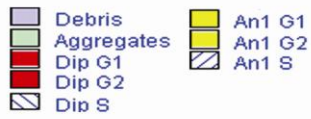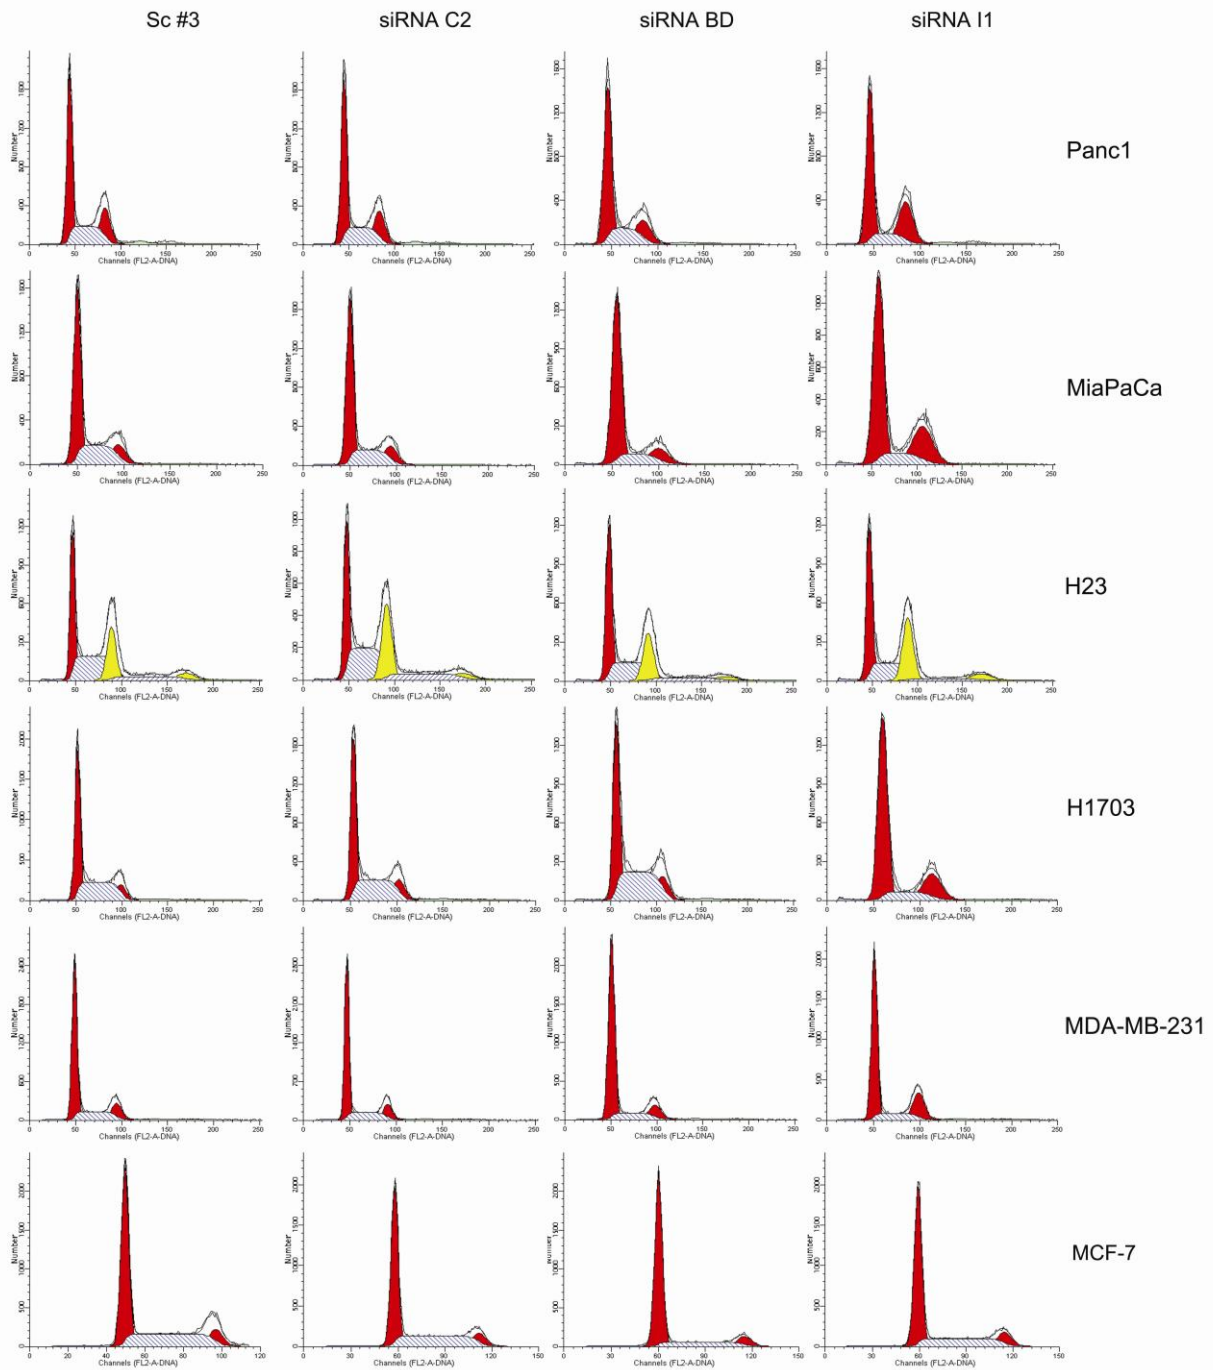

**Supplemental Figure 1: Representative histogram plots for FACS cell cycle analysis.** Experimental design is as described previously (Fig. 3).

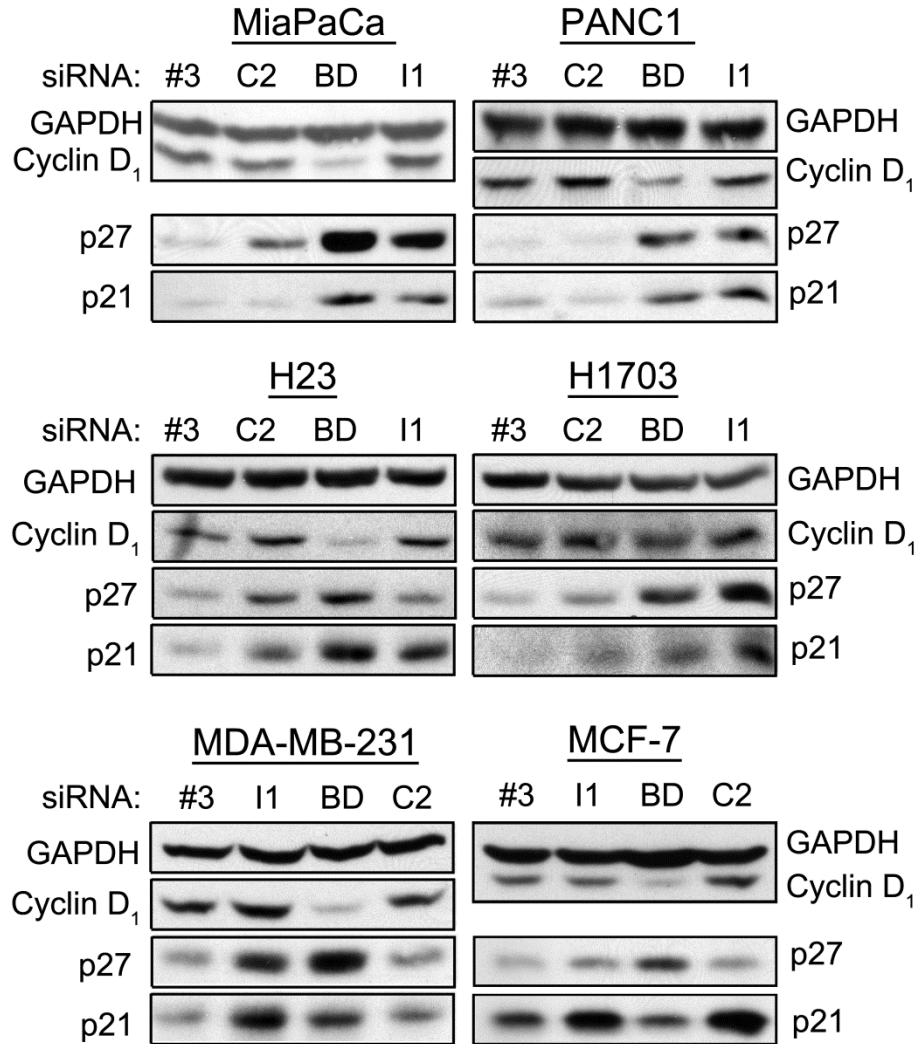

**Supplemental Figure 2: Protein expression blots in cancer cell lines after knockdown of SmgGDS splice variants.** Experimental design is as described previously (Fig. 4).

### H1703-TR-LUC-shRNA cell line

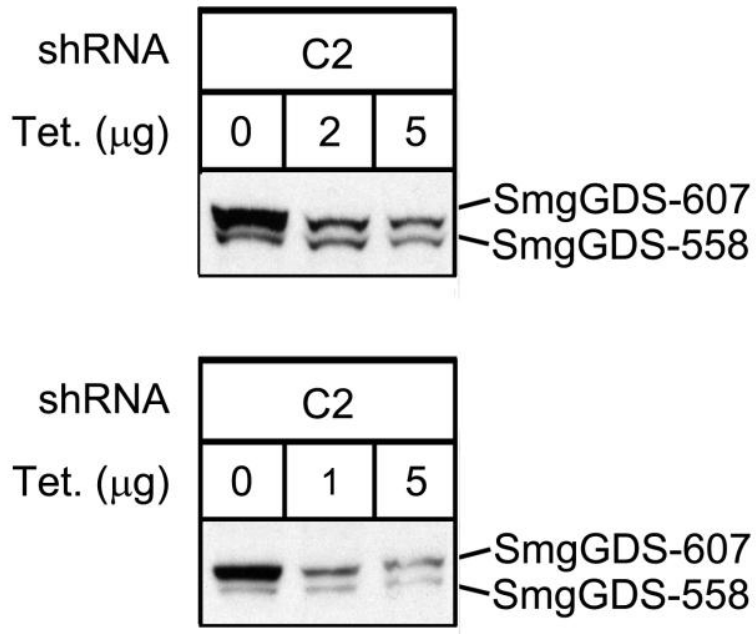

**Supplemental Figure 3: H1703-LUC-TR cell line stably expressing shRNA C2 representative blots.**

Experimental design is as described previously (Fig. 5A). The blots represent two additional, independent, replications of the data in Fig. 5A conducted on different dates. The lower blot utilizes 0, 1, and 5 μg of tetracycline as indicated in the figure.

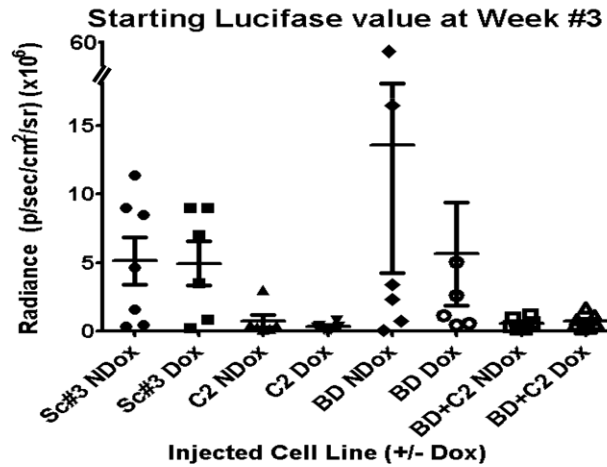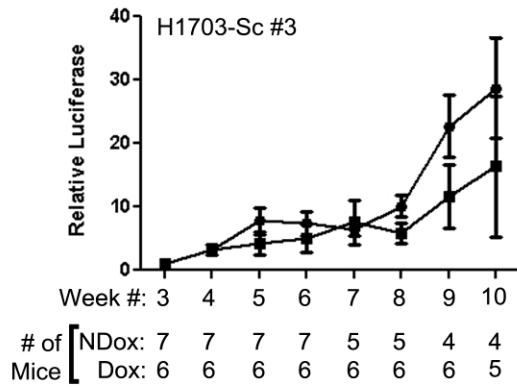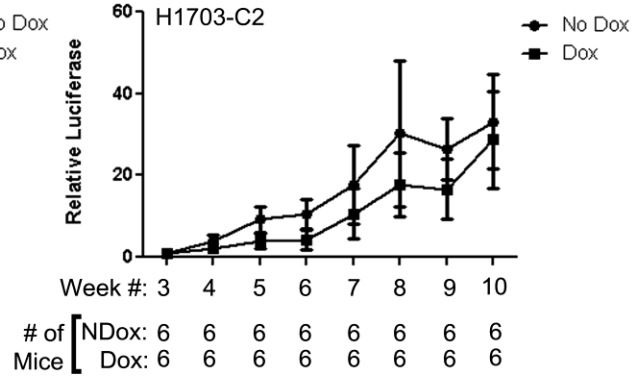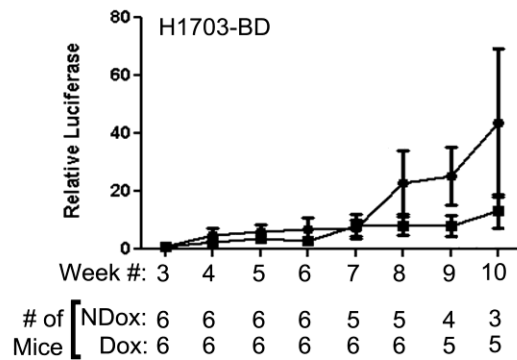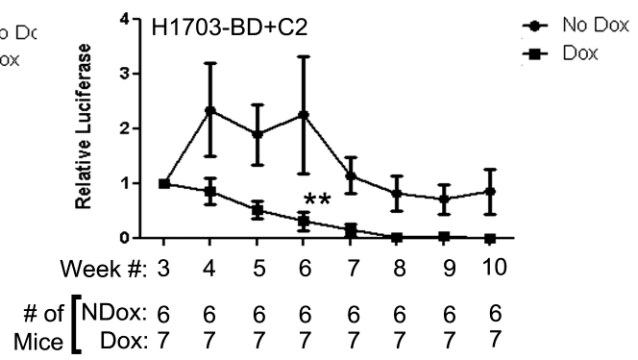

**Supplemental Figure 4: Additional mouse tumor data.** A. The scatterplot represents raw starting luciferase value for each mouse used in the study injected with the indicated cell lines (+ or - doxycycline). Value is shown as Radiance (p/sec/cm<sup>2</sup>/sr) and is reported as the number  $\times 10^6$ . There was

no significant difference between the doxycycline treated and non-doxycycline treated starting luciferase values for each injected cell line. **B.** The graphs represent relative weekly growth of tumors as described previously (**Fig. 5**) with the addition of week 7-10 data. The number of mice at week 7 in the control group (Sc #3) fell below the 6 mouse threshold for the study. The number of mice for each treatment group is indicated below the graph.
